# Supplementary material for: Long-Term Hindcasts of Wheat Yield in Fields Using Remotely Sensed Phenology, Climate Data and Machine Learning
Source: MDPI journal article supplement (doi:10.3390/rs13132435), 2021-06-22

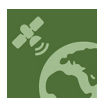

Article

# Long-term hindcasts of wheat yield in fields using remotely sensed phenology, climate data and machine learning – Supplementary Materials 1: Maps of phenological and seasonal climate metrics

Fiona H. Evans <sup>1,2,\*</sup> and Jianxiu Shen <sup>1</sup>

<sup>1</sup> Centre for Crop and Food Innovation, Food Futures Institute, Murdoch University, 90 South Street, Murdoch, WA Australia 6150

<sup>2</sup> Centre for Digital Agriculture, Centre for Crop and Disease Management, Curtin University, Kent Street, Bentley, WA Australia 6102

\* Correspondence: [Fiona.Evans@murdoch.edu.au](mailto:Fiona.Evans@murdoch.edu.au)

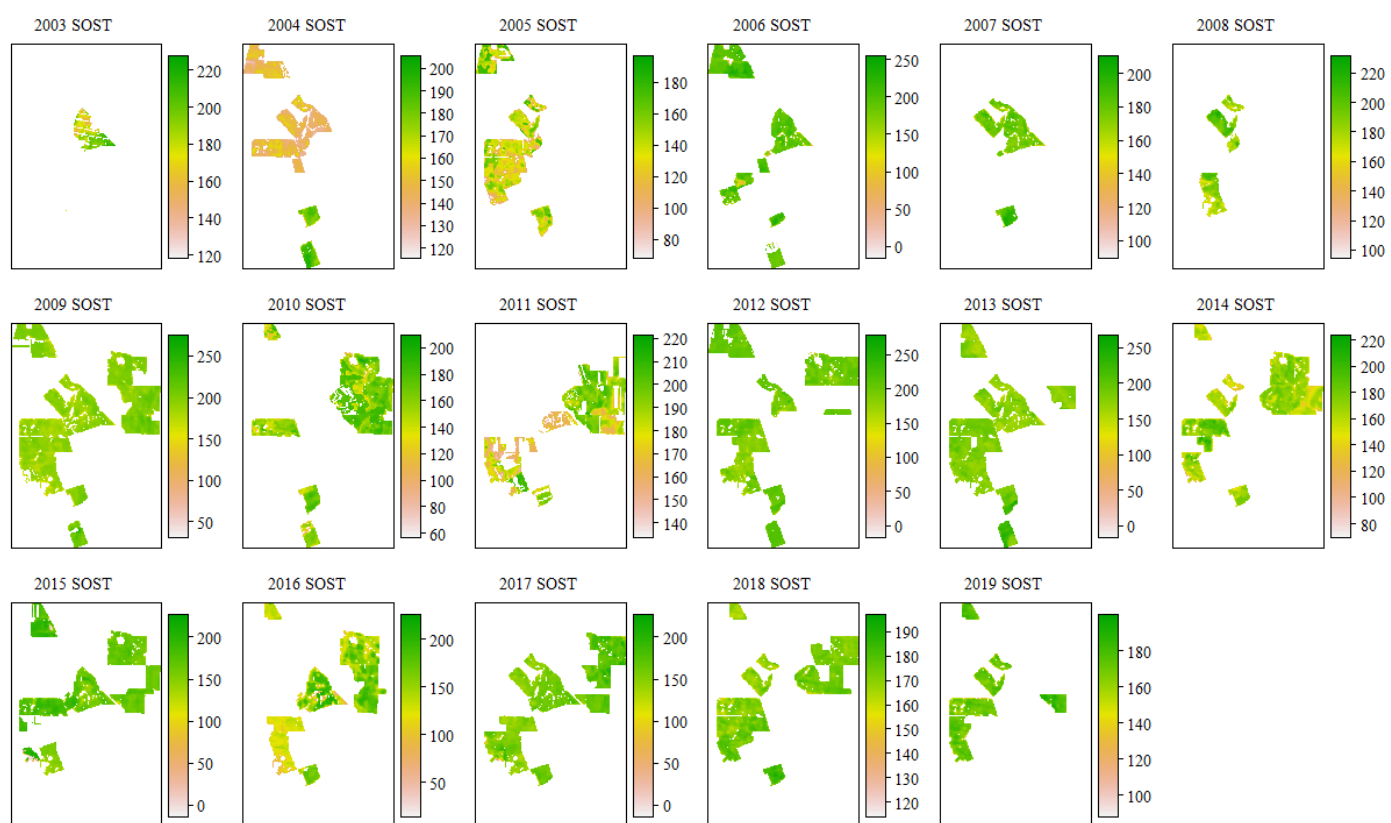

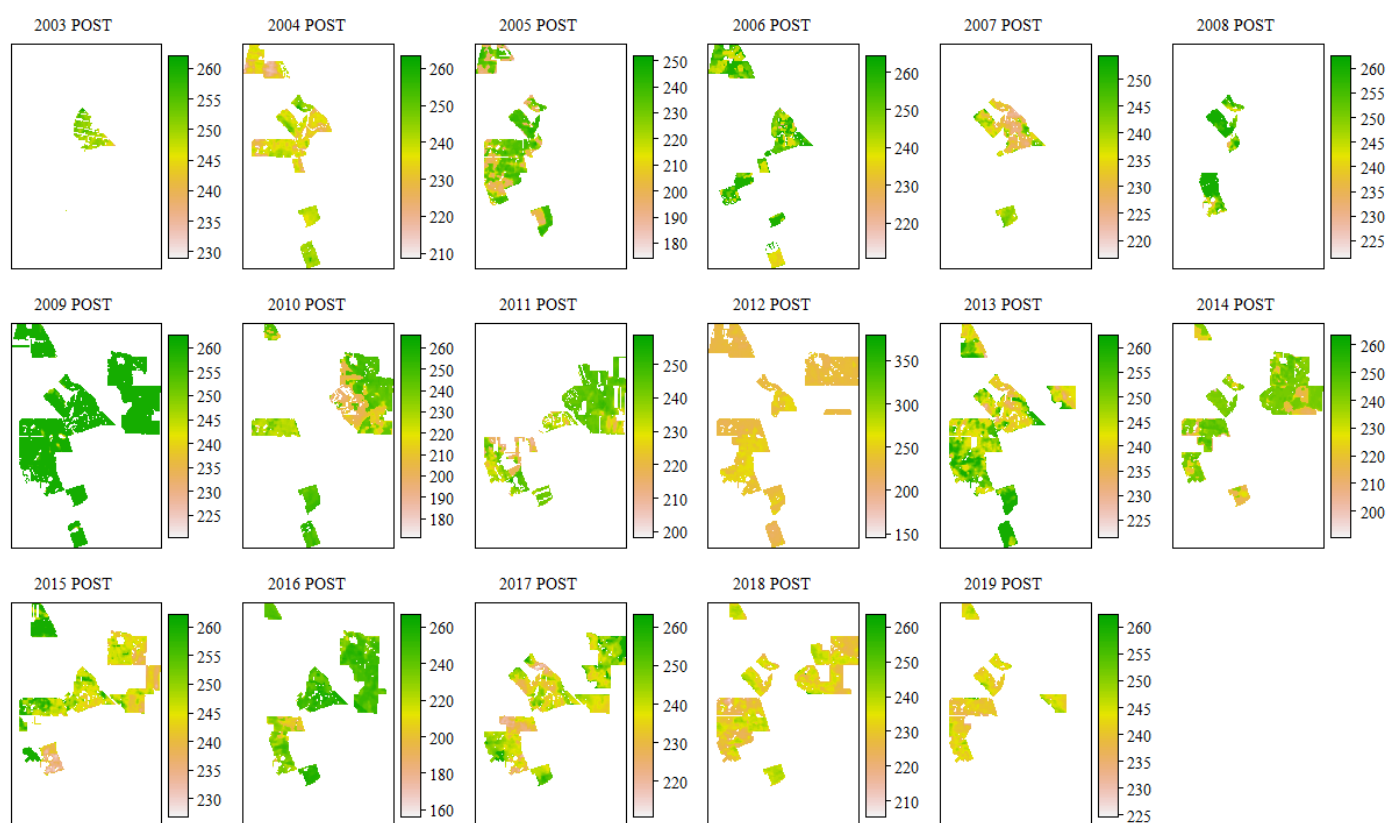

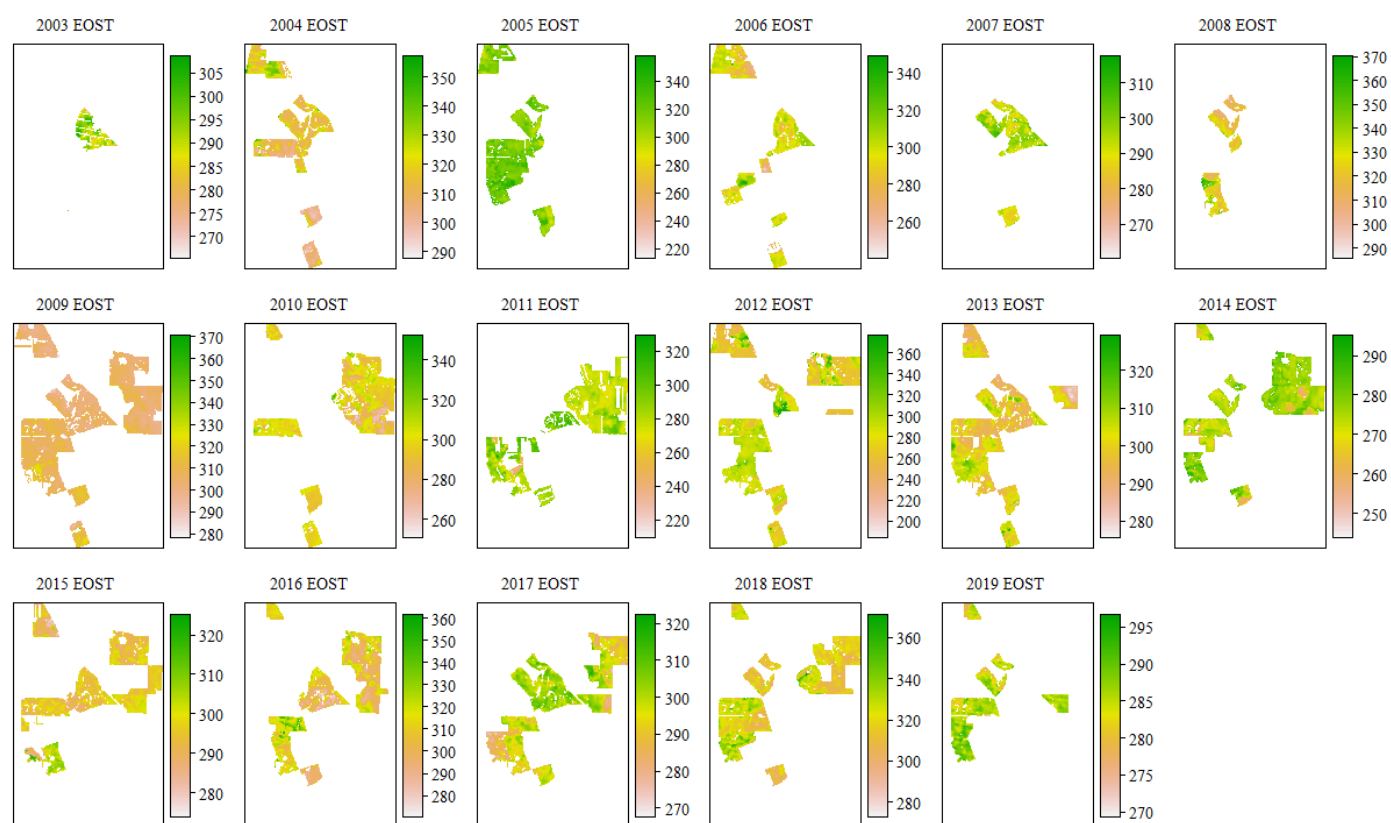

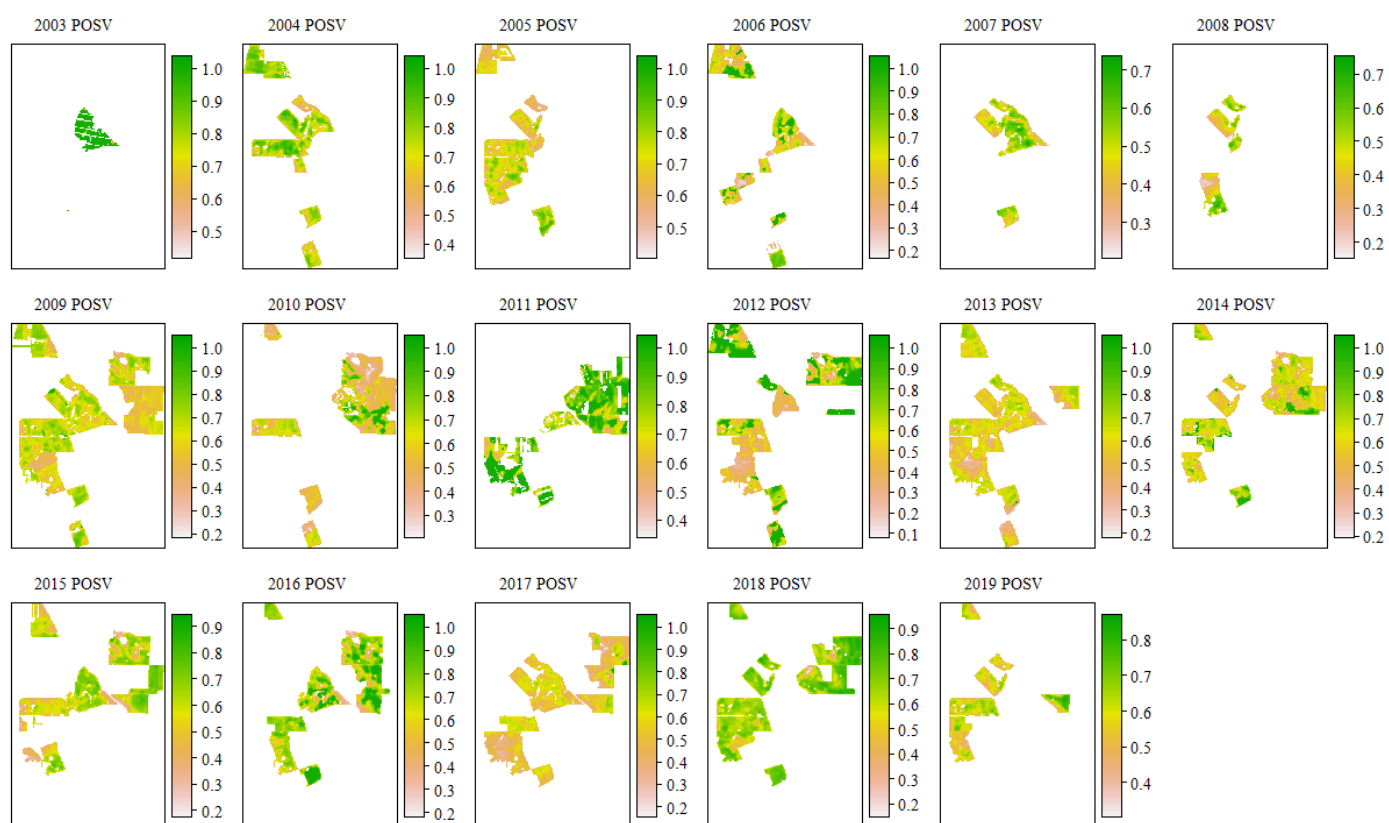

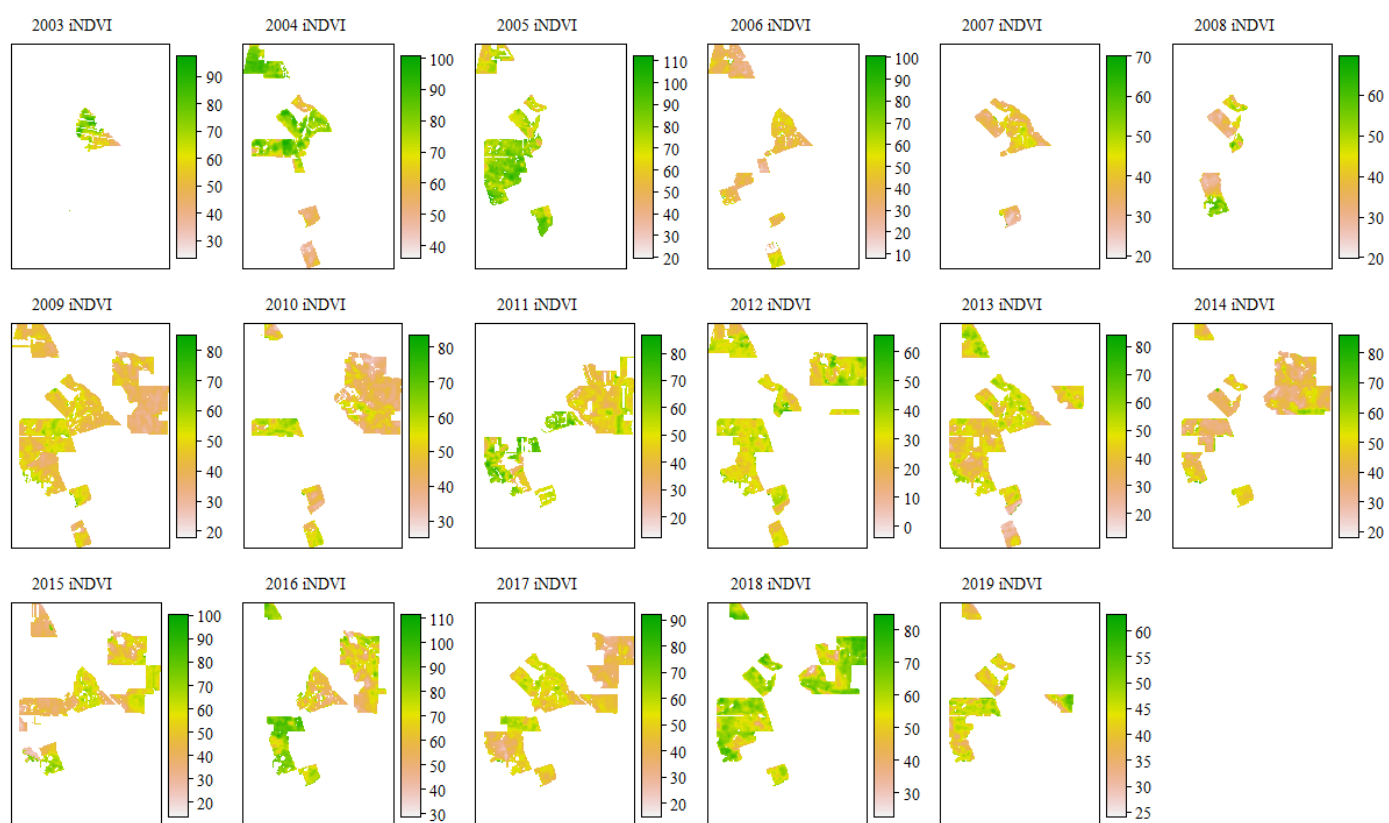

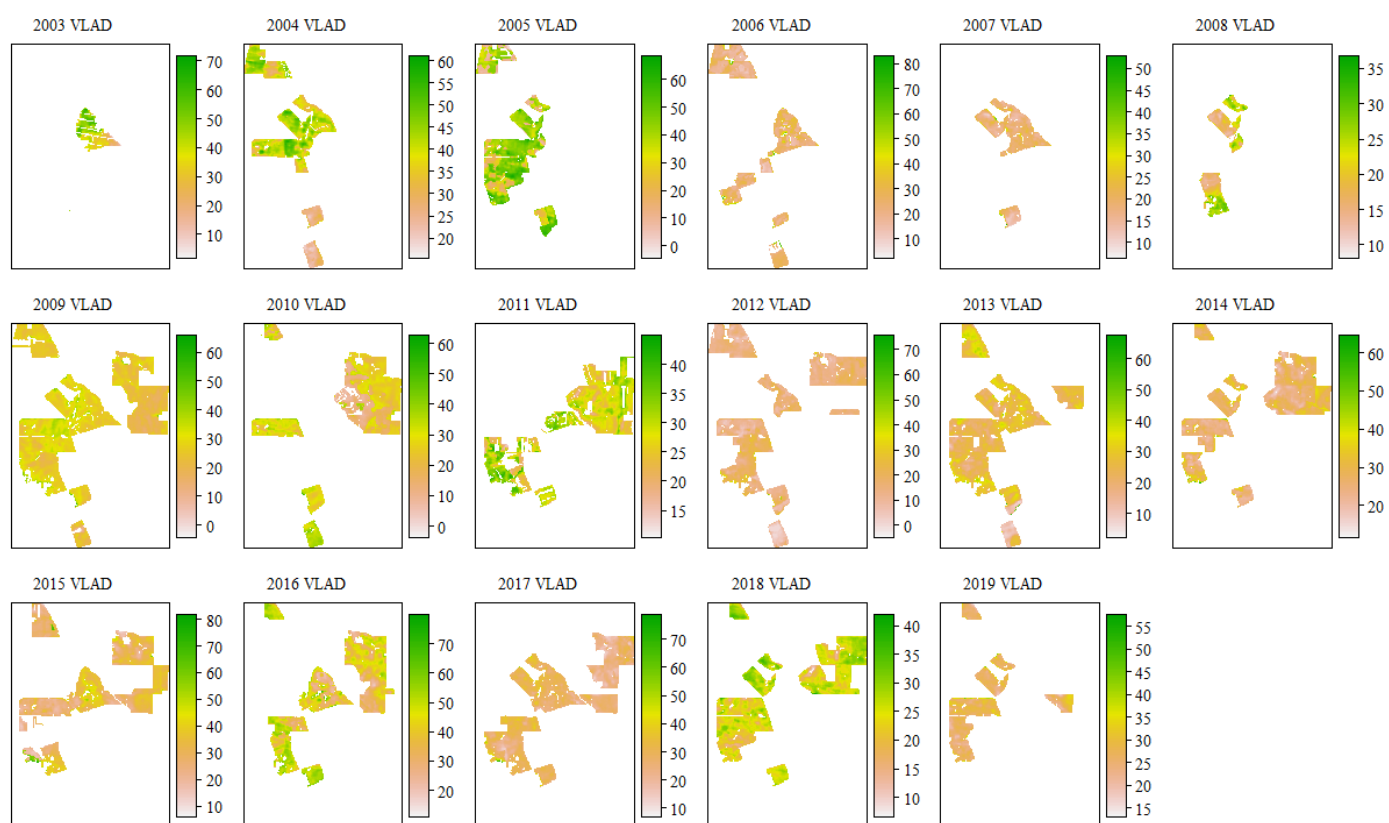

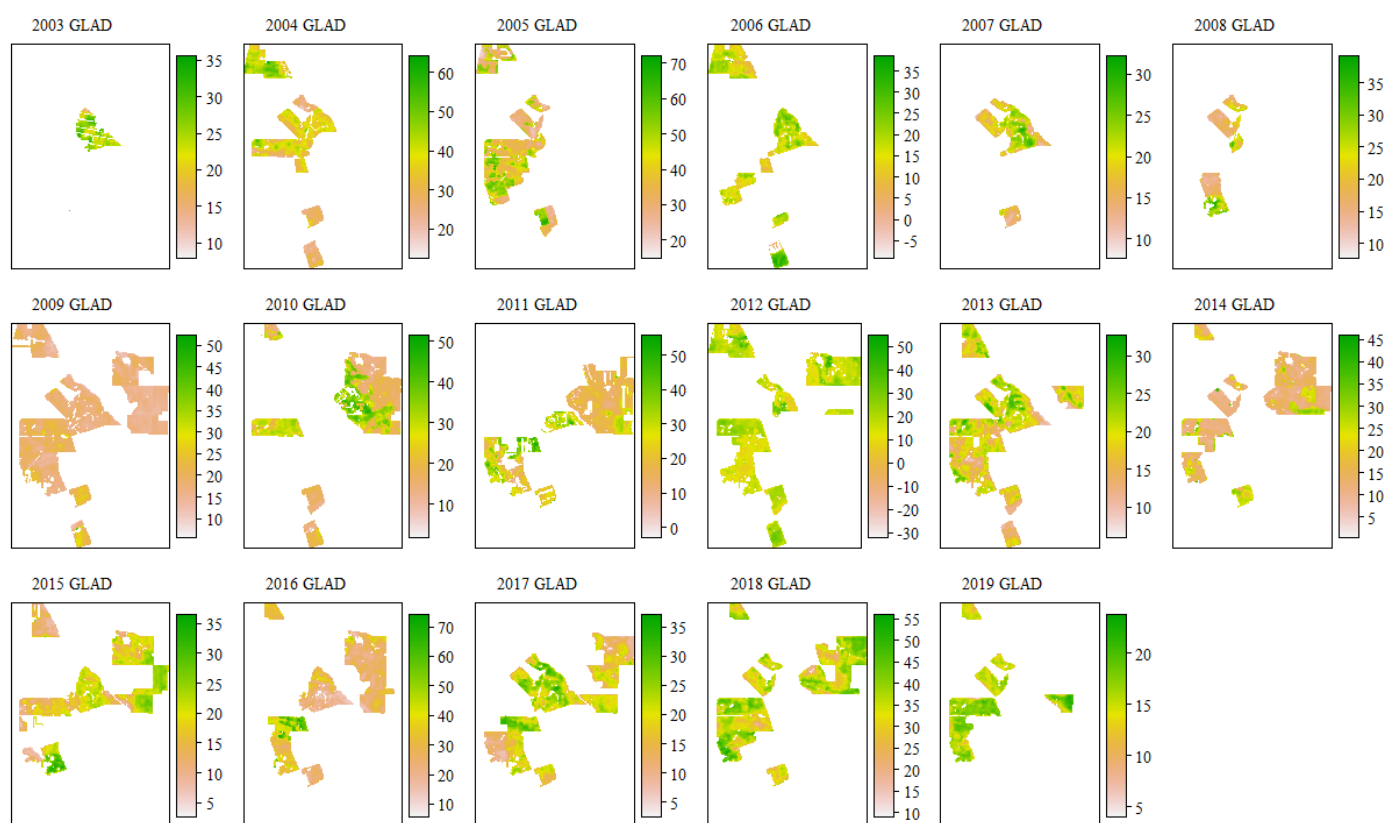



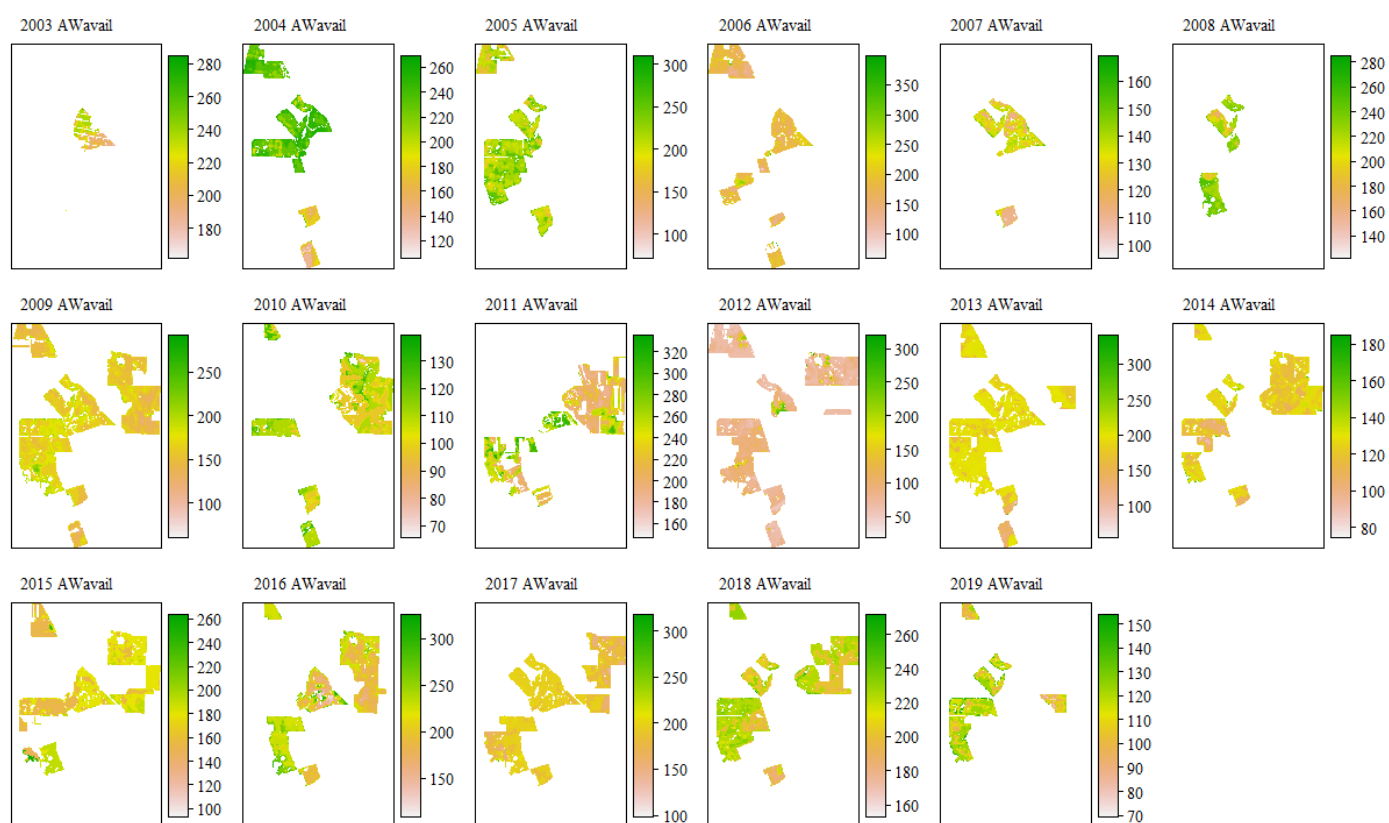

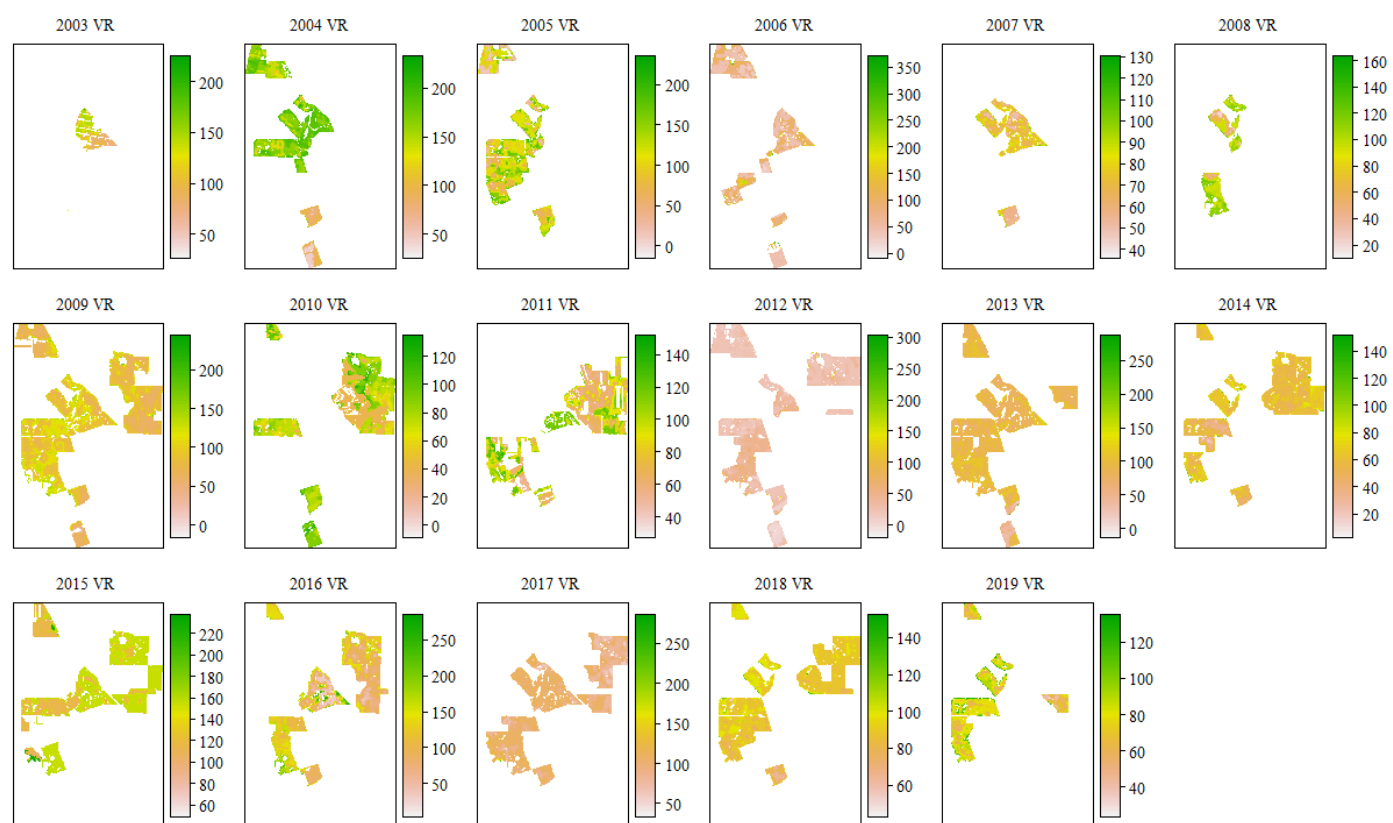

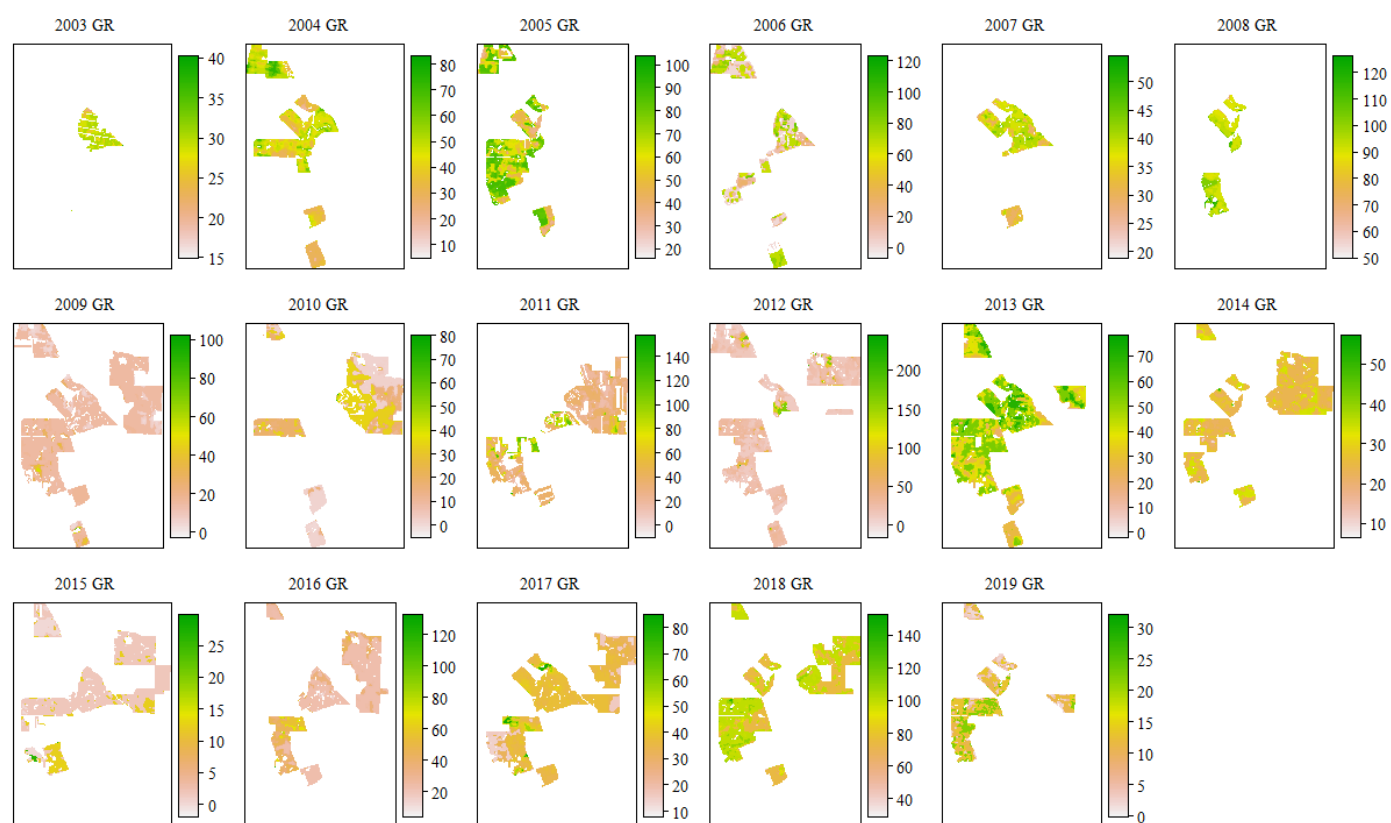

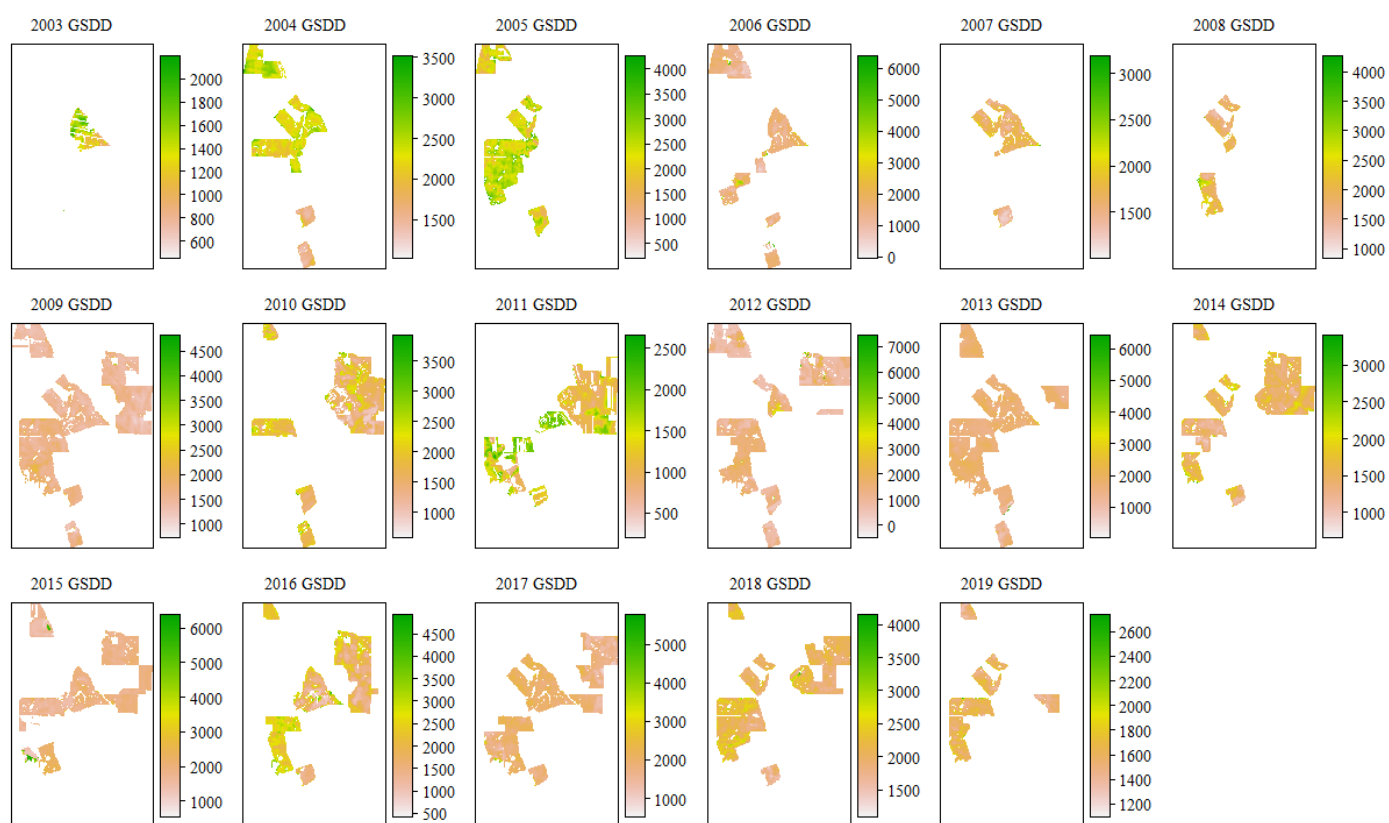

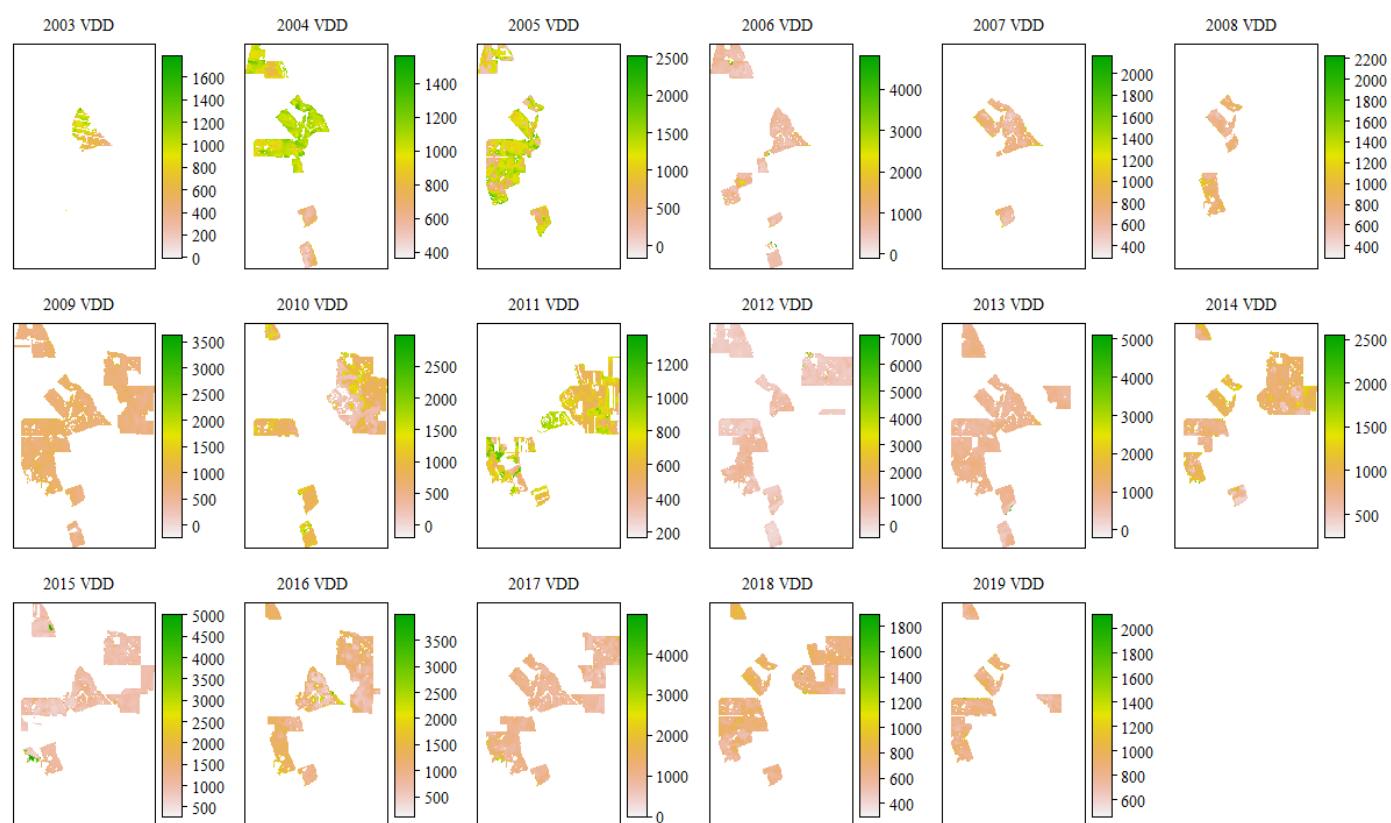

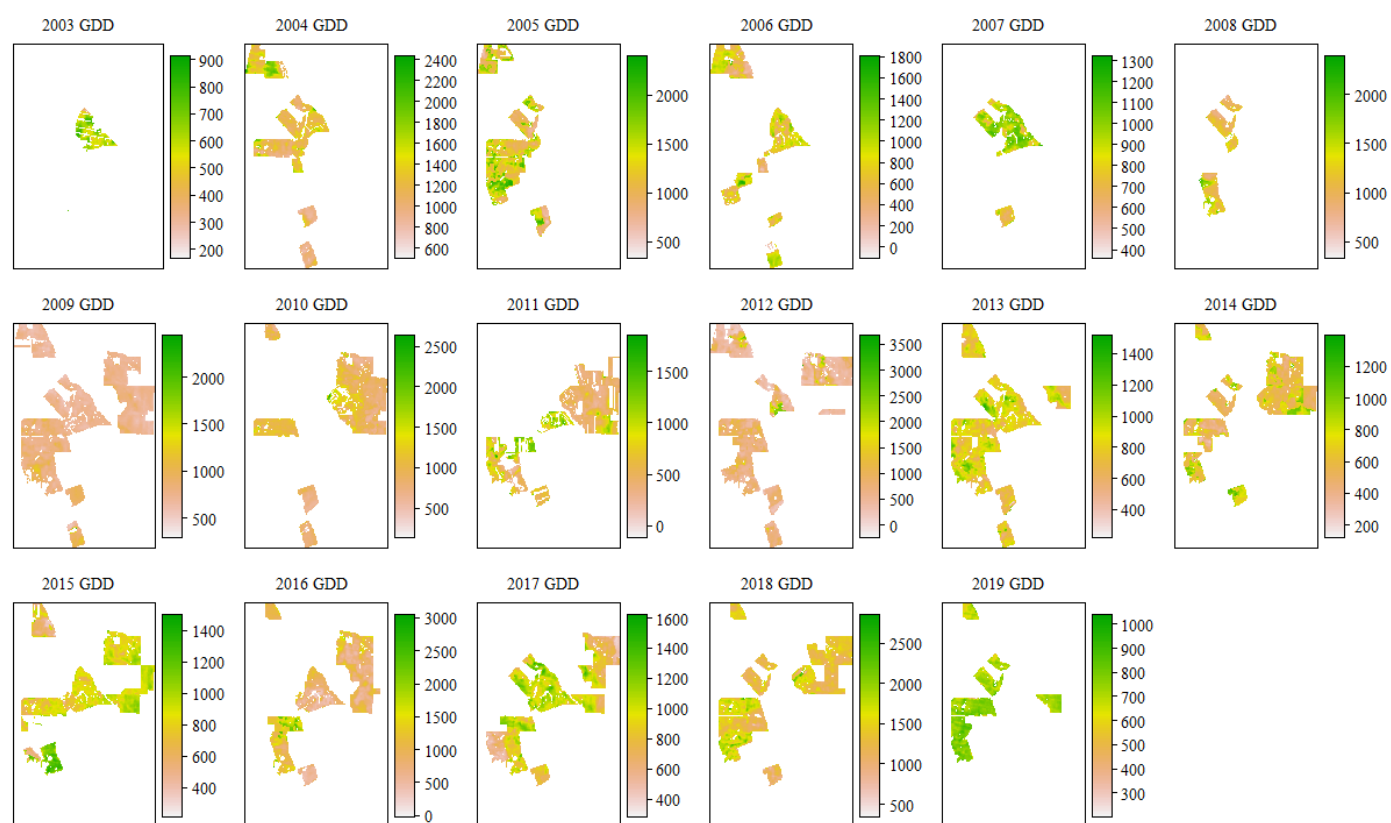

Supplement: s1 [file s1]
