# Supplementary material for: Long-Term Hindcasts of Wheat Yield in Fields Using Remotely Sensed Phenology, Climate Data and Machine Learning
Source: MDPI journal article supplement (doi:10.3390/rs13132435), 2021-06-22
Supplement: s1 [file s1]

Archive with 2 entries (2 files):
- Supplementary Materials 1.pdf
- Supplementary Materials 2.pdf
